# Supplementary material for: Glucocorticoid receptor modulation decreases ER-positive breast cancer cell proliferation and suppresses wild-type and mutant ER chromatin association
Source: Springer Nature journal article supplement (doi:10.1186/s13058-019-1164-6), 2019-07-24

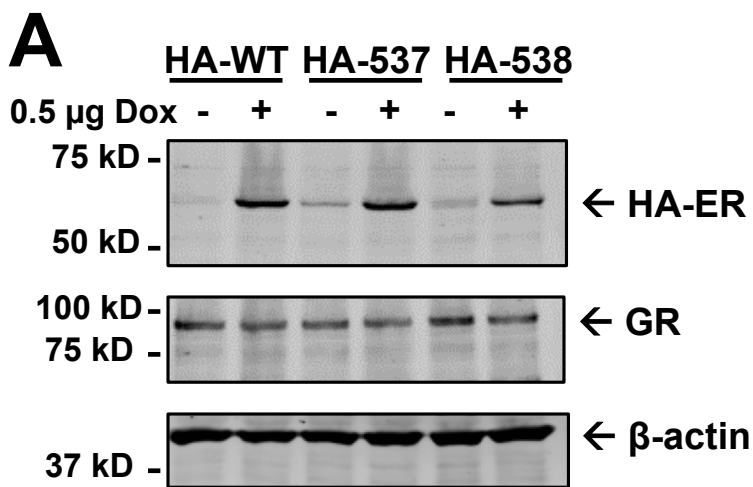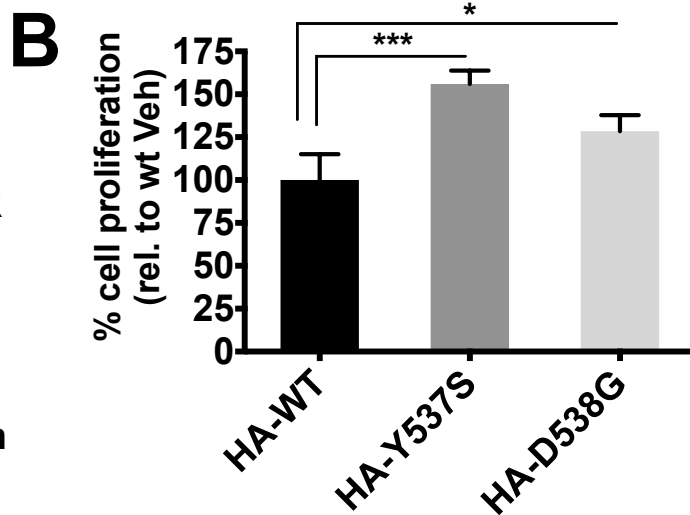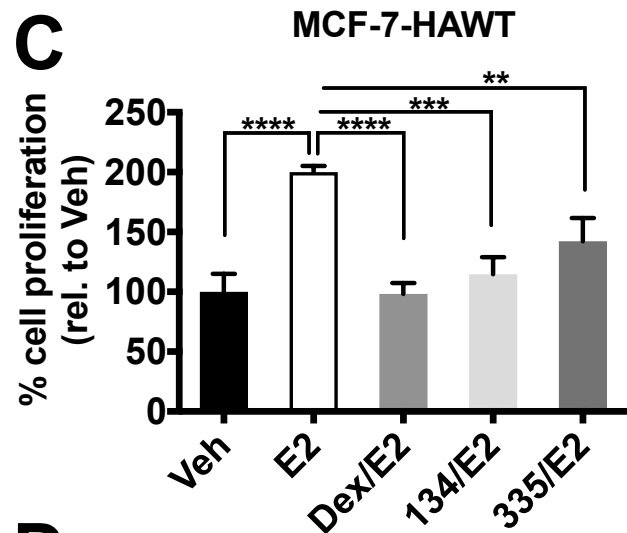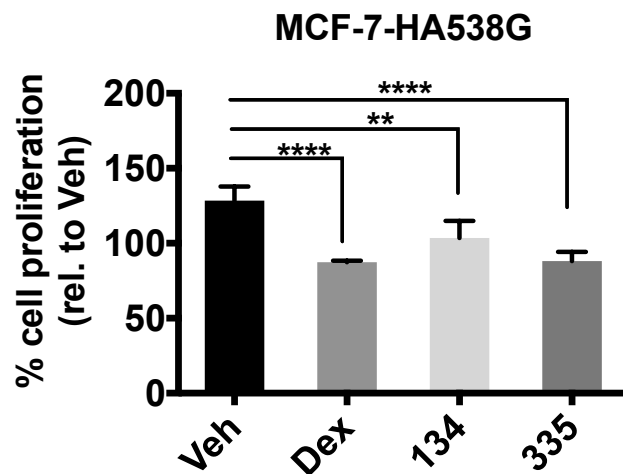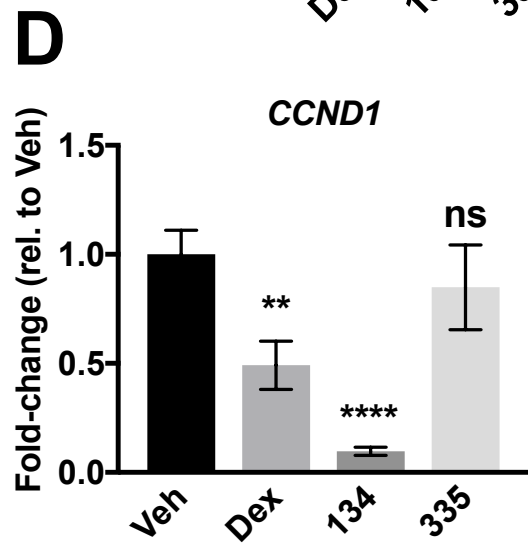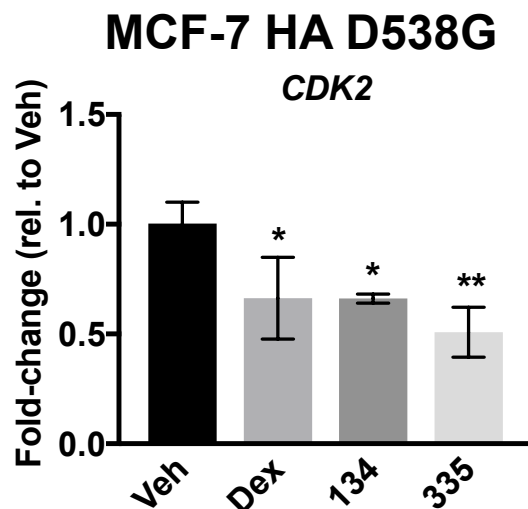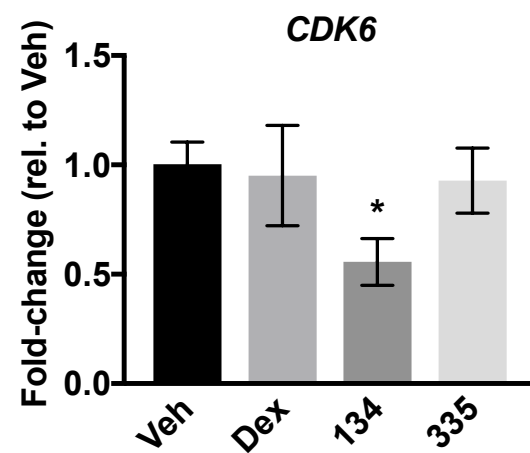

Supplement: MOESM5 [file 16986208]
